# Supplementary material
Source: publisher figshare collection journal article supplement (https://gsajournals.figshare.com/articles/dataset/_/6741245)
Supplement: Supplementary file 1 [file 1]

**Table S7 Segregating sites in tested upstream regions and their frequencies in a Dutch and a Zambian population**

| Gene           | Position <sup>a</sup> | Variant <sup>b</sup> |          | Frequency<br>Ancestral Variant <sup>c</sup> |       |
|----------------|-----------------------|----------------------|----------|---------------------------------------------|-------|
|                |                       | ZI418                | S58      | ZI                                          | NL    |
| <i>Cyp6a20</i> | 52                    | <b>C</b>             | T        | 0.765                                       | 0.000 |
|                | 105                   | C                    | <b>A</b> | 0.633                                       | 1.000 |
|                | <b>251</b>            | <b>G</b>             | T        | 0.510                                       | 0.000 |
|                | 285                   | <b>T</b>             | A        | 0.913                                       | 0.818 |
|                | <b>558</b>            | A                    | <b>G</b> | 0.138                                       | 0.091 |
|                | 573                   | A                    | <b>G</b> | 0.510                                       | 1.000 |
|                | <b>699*</b>           | <b>G</b>             | C        | 0.918                                       | 0.800 |
|                | 746                   | T                    | <b>C</b> | 0.638                                       | 1.000 |
| <i>Cyp6t1</i>  | 19                    | C                    | <b>G</b> | 0.592                                       | 0.667 |
|                | 63                    | <b>C</b>             | T        | 0.872                                       | 0.100 |
|                | 79                    | A                    | <b>G</b> | 0.888                                       | 0.727 |
|                | 122                   | C                    | <b>A</b> | 0.469                                       | 0.182 |
|                | 213                   | A                    | <b>C</b> | 0.893                                       | 0.727 |
|                | 226                   | C                    | <b>T</b> | 0.893                                       | 0.727 |
|                | 256                   | C                    | <b>A</b> | 0.893                                       | 0.727 |
|                | 284                   | <b>G</b>             | T        | 0.124                                       | 0.000 |
|                | 286                   | A                    | <b>G</b> | 0.893                                       | 0.727 |
|                | 309                   | A                    | <b>C</b> | 0.893                                       | 0.727 |
|                | <b>319</b>            | C                    | <b>T</b> | 0.893                                       | 0.727 |
|                | 333                   | T                    | <b>A</b> | 0.878                                       | 0.727 |
|                | <b>373</b>            | T                    | C        | 0.893                                       | 0.727 |
|                | 404                   | C                    | <b>A</b> | 0.878                                       | 0.727 |
|                | 572                   | <b>G</b>             | A        | 1.000                                       | 0.400 |
|                | 622                   | <b>C</b>             | T        | 0.985                                       | 0.200 |
|                | 630                   | C                    | <b>T</b> | 0.888                                       | 0.700 |
|                | 646                   | A                    | C        | 0.980                                       | 0.200 |
|                | <b>710</b>            | <b>A</b>             | T        | 0.036                                       | 0.455 |
|                | 772                   | <b>C</b>             | T        | 0.980                                       | 0.273 |
|                | 863                   | A                    | <b>T</b> | 1.000                                       | 1.000 |
|                | 864                   | A                    | <b>C</b> | 1.000                                       | 1.000 |
|                | 1174                  | <b>A</b>             | G        | 0.291                                       | 0.182 |
|                | 1318                  | <b>C</b>             | T        | 0.607                                       | 0.636 |
|                | 1408                  | <b>G</b>             | T        | 0.985                                       | 0.182 |
|                | 1409                  | <b>C</b>             | A        | 0.985                                       | 0.182 |
|                | 1488                  | <b>A</b>             | G        | 0.930                                       | 0.182 |
|                | <b>1588</b>           | <b>C</b>             | T        | 0.990                                       | 0.091 |
|                | 1600                  | <b>G</b>             | A        | 0.653                                       | 0.100 |

|                |      |          |          |       |       |
|----------------|------|----------|----------|-------|-------|
|                | 1609 | <b>G</b> | A        | 0.995 | 0.182 |
|                | 1614 | G        | <b>A</b> | 0.510 | 0.727 |
|                | 1735 | C        | <b>G</b> | 0.000 | 0.000 |
| <i>Cyp12a4</i> | 34   | G        | T        | 0.537 | 0.909 |
|                | 136  | <b>T</b> | A        | 0.878 | 0.455 |
|                | 147  | T        | <b>G</b> | 0.846 | 1.000 |
|                | 229  | A        | <b>T</b> | 0.862 | 1.000 |
|                | 257  | <b>C</b> | T        | 0.681 | 0.300 |
|                | 263  | <b>A</b> | C        | 0.691 | 0.300 |
|                | 314  | G        | <b>A</b> | 0.775 | 1.000 |
|                | 316  | T        | <b>A</b> | 0.774 | 1.000 |
|                | 360  | C        | <b>A</b> | 0.840 | 1.000 |
|                | 362  | G        | <b>A</b> | 0.929 | 1.000 |
|                | 372  | G        | <b>T</b> | 1.000 | 1.000 |
|                | 472  | <b>G</b> | A        | 0.069 | 0.636 |
|                | 524  | <b>G</b> | T        | 0.591 | 0.091 |
| <i>Cyp12a5</i> | 56   | <b>C</b> | A        | 0.513 | 0.364 |
|                | 189  | A        | <b>G</b> | 0.755 | 1.000 |
|                | 414  | <b>A</b> | G        | 0.653 | 0.091 |
|                | 504  | T        | <b>C</b> | 0.554 | 0.818 |
|                | 537  | <b>C</b> | A        | 0.533 | 0.200 |
|                | 667  | <b>C</b> | T        | 0.750 | 0.000 |
|                | 774  | <b>A</b> | T        | 0.626 | 0.091 |
|                | 775  | <b>C</b> | T        | 0.839 | 0.091 |
|                | 777  | <b>A</b> | C        | 0.795 | 0.091 |
|                | 781  | C        | <b>A</b> | 0.190 | 0.909 |
|                | 903  | C        | <b>T</b> | 0.599 | 1.000 |
|                | 904  | T        | <b>C</b> | 0.599 | 1.000 |
|                | 972  | A        | <b>G</b> | 0.595 | 0.909 |
|                | 1003 | <b>C</b> | A        | 0.503 | 0.182 |
|                | 1099 | <b>G</b> | T        | 0.711 | 0.000 |
|                | 1106 | <b>T</b> | C        | 0.959 | 0.100 |
|                | 1117 | T        | <b>A</b> | 0.593 | 0.909 |
|                | 1136 | A        | <b>C</b> | 0.772 | 1.000 |
| <i>Cyp12b2</i> | 46   | C        | <b>T</b> | 0.595 | 1.000 |
|                | 118  | A        | <b>G</b> | 0.071 | 1.000 |
|                | 140  | G        | <b>T</b> | 0.964 | 1.000 |
|                | 157  | <b>G</b> | A        | 0.726 | 0.000 |
|                | 172  | C        | <b>T</b> | 0.329 | 1.000 |
|                | 203  | C        | <b>T</b> | 0.883 | 1.000 |
|                | 290  | <b>G</b> | C        | 0.995 | 0.700 |
|                | 298  | <b>A</b> | T        | 0.751 | 0.000 |
|                | 353  | C        | <b>A</b> | 0.832 | 0.000 |

|  |     |          |          |       |       |
|--|-----|----------|----------|-------|-------|
|  | 423 | <b>C</b> | G        | 0.766 | 1.000 |
|  | 147 | A        | <b>A</b> | 0.883 | 0.700 |
|  | 187 | G        | <b>G</b> | 0.843 | 0.700 |
|  | 193 | <b>A</b> | C        | 0.526 | 0.900 |
|  | 252 | <b>A</b> | G        | 0.599 | 0.900 |
|  | 366 | T        | <b>A</b> | 0.655 | 1.000 |
|  | 442 | <b>G</b> | A        | 0.731 | 0.600 |
|  | 482 | <b>C</b> | T        | 0.822 | 0.800 |
|  | 563 | G        | <b>T</b> | 0.863 | 1.000 |
|  | 569 | G        | <b>A</b> | 0.812 | 1.000 |
|  | 594 | T        | <b>C</b> | 0.959 | 1.000 |

*Cyp28a5*

<sup>a</sup>Position in alignment of Zambian and Dutch populations of tested upstream region.

Positions shown in red overlap with at least one predicted transcription factor binding site with predicted differential binding between Z418 and S58. Asterisk indicates that site that corresponds to female *cis*-eQTL identified by Massouras *et al.* (2012).

<sup>b</sup>SNP variant in tested upstream regions. The ancestral variant is shown in bold and was inferred from an alignment with *D. simulans*, *D. sechelia*, and *D. yakuba*.

<sup>c</sup>Frequency of the ancestral variant in Zambian (ZI) and Dutch (NL) populations. When the ancestral variant could not be inferred, the frequency of Zambian variant is shown.
