# Supplementary material
Source: publisher figshare collection journal article supplement (https://gsajournals.figshare.com/articles/dataset/_/6741245)
Supplement: Supplementary file 3 [file 1]

**Table S5 Overlap between *In(2L)t*-affected genes and differentially expressed genes in comparisons involving strain S26**

| Comparison           | Total Genes | Significant genes <sup>a</sup> | <i>In(2L)t</i> genes <sup>b</sup> | Exp. overlap | Obs. overlap | <i>P</i> <sup>c</sup> |
|----------------------|-------------|--------------------------------|-----------------------------------|--------------|--------------|-----------------------|
| <b>Parental</b>      |             |                                |                                   |              |              |                       |
| S26 vs. S58          | 7415        | 1767                           | 124                               | 29.5         | 43           | 0.007                 |
| S26 vs. Z418         | 7415        | 1702                           | 124                               | 28.5         | 35           | 0.202                 |
|                      |             |                                |                                   |              |              |                       |
| <b>ASE</b>           |             |                                |                                   |              |              |                       |
| S26 vs. S58          | 2162        | 81                             | 36                                | 1.3          | 2            | 0.901                 |
| S26 vs. Z418         | 4860        | 178                            | 86                                | 3.1          | 10           | 0.001                 |
|                      |             |                                |                                   |              |              |                       |
| <b>P2 Dominant</b>   |             |                                |                                   |              |              |                       |
| S26xS58              | 7415        | 1365                           | 124                               | 22.8         | 26           | 0.541                 |
| S26xZ418             | 7415        | 2031                           | 124                               | 34.0         | 33           | 0.927                 |
|                      |             |                                |                                   |              |              |                       |
| <b>Misexpression</b> |             |                                |                                   |              |              |                       |
| S26xZ418             | 7415        | 1269                           | 124                               | 21.2         | 12           | 0.039                 |

<sup>a</sup>Genes showing DE, ASE, or the given mode of inheritance in our data.

<sup>b</sup>Number of *In(2L)t*-affected genes that were included in our analyzed gene set.

<sup>c</sup>*P*-value of  $\chi^2$ -test.
