# Supplementary material
Source: publisher figshare collection journal article supplement (https://gsajournals.figshare.com/articles/dataset/_/6741245)
Supplement: Supplementary file 4 [file 1]

**Table S9 Summary statistics and genetic differentiation of 50 kb surrounding tested upstream regions in a Dutch and a Zambian population**

| Upstream region | Size (bp) |             |                    |                |                |                |             |                   |                     |                                   |                   |                                |                                 |                                   |                  |
|-----------------|-----------|-------------|--------------------|----------------|----------------|----------------|-------------|-------------------|---------------------|-----------------------------------|-------------------|--------------------------------|---------------------------------|-----------------------------------|------------------|
|                 |           | Population  | Sites <sup>a</sup> | N <sup>b</sup> | S <sup>c</sup> | $\theta^{d,e}$ | $\pi^{d,f}$ | nHap <sup>g</sup> | HapDiv <sup>h</sup> | Dxy <sub>sim</sub> <sup>d,i</sup> | TajD <sup>j</sup> | P <sub>priv</sub> <sup>k</sup> | D <sub>fixed</sub> <sup>l</sup> | Dxy <sub>pop</sub> <sup>d,m</sup> | Fst <sup>n</sup> |
| Cyp6a20         | 50,768    | Netherlands | 36,036             | 11             | 324            | 0.307          | 0.284       | 8                 | 0.927               | 5.291                             | -0.375            | 38                             | 0                               | 0.61                              | 0.266            |
|                 |           | Zambia      | 29,604             | 196            | 2,049          | 1.183          | 0.793       | 178               | 0.999               | 5.452                             | -1.132            | 1,626                          |                                 |                                   |                  |
| Cyp6t1          | 51,736    | Netherlands | 26,569             | 11             | 287            | 0.369          | 0.300       | 11                | 1.000               | 7.067                             | -0.903            | 44                             | 0                               | 0.628                             | 0.366            |
|                 |           | Zambia      | 22,537             | 196            | 1,076          | 0.816          | 0.570       | 190               | 1.000               | 6.312                             | -1.022            | 765                            |                                 |                                   |                  |
| Cyp12a4         | 50,571    | Netherlands | 37,948             | 11             | 731            | 0.658          | 0.649       | 10                | 0.982               | 4.648                             | -0.095            | 41                             | 0                               | 0.874                             | 0.160            |
|                 |           | Zambia      | 29,264             | 196            | 2,980          | 1.740          | 1.002       | 185               | 0.999               | 4.537                             | -1.462            | 2,161                          |                                 |                                   |                  |
| Cyp12a5         | 51,220    | Netherlands | 38,361             | 11             | 751            | 0.668          | 0.659       | 10                | 0.982               | 4.615                             | -0.103            | 41                             | 0                               | 0.889                             | 0.161            |
|                 |           | Zambia      | 29,623             | 197            | 3,086          | 1.778          | 1.023       | 187               | 0.999               | 4.537                             | -1.464            | 2,229                          |                                 |                                   |                  |
| Cyp12b2         | 50,447    | Netherlands | 40,200             | 11             | 442            | 0.375          | 0.375       | 11                | 1.000               | 3.967                             | -0.242            | 68                             | 0                               | 0.771                             | 0.251            |
|                 |           | Zambia      | 38,917             | 197            | 3,997          | 1.753          | 1.031       | 186               | 0.999               | 4.140                             | -1.431            | 3,056                          |                                 |                                   |                  |
| Cyp28a5         | 50,618    | Netherlands | 42,020             | 11             | 574            | 0.466          | 0.414       | 11                | 1.000               | 4.901                             | -0.543            | 86                             | 0                               | 0.602                             | 0.091            |
|                 |           | Zambia      | 37,674             | 197            | 4,036          | 1.829          | 1.051       | 191               | 1.000               | 4.960                             | -1.465            | 3,023                          |                                 |                                   |                  |

<sup>a</sup>Number of sites included in the analysis (no missing data)

- <sup>b</sup>Number of samples
- <sup>c</sup>Number of segregating sites
- <sup>d</sup>Per 100 sites
- <sup>e</sup>Watterson's estimator of nucleotide diversity
- <sup>f</sup>Mean pairwise nucleotide diversity
- <sup>g</sup>Number of haplotypes
- <sup>h</sup>Haplotype diversity
- <sup>i</sup>Average number of nucleotide substitutions per site between population of interest and *D. simulans*
- <sup>j</sup>Tajima's D, all tests non-significant ( $P > 0.10$ )
- <sup>k</sup>Number of polymorphisms private to the population of interest
- <sup>l</sup>Number of fixed differences between populations
- <sup>m</sup>Average number of nucleotide substitutions per site between populations
- <sup>n</sup>Fixation index between populations
