# Supplementary material
Source: publisher figshare collection journal article supplement (https://gsajournals.figshare.com/articles/dataset/_/6741245)
Supplement: Supplementary file 5 [file 1]

**Table S6 TFBS models with predicted differential binding between the tested S58 and Z418 upstream regions**

| Upstream Region | TF Model <sup>a</sup> | Strand <sup>b</sup> | Start <sup>c</sup> | Positions affected <sup>d</sup> | S58 <sup>e</sup> |        | Z418 <sup>e</sup> |         |
|-----------------|-----------------------|---------------------|--------------------|---------------------------------|------------------|--------|-------------------|---------|
|                 |                       |                     |                    |                                 | Weight           | ln(P)  | Weight            | ln(P)   |
| <i>Cyp6a20</i>  | B-H1                  | -                   | -521               | 251                             | 7                | -9.263 | -                 | -       |
|                 |                       |                     |                    |                                 |                  | -      |                   |         |
| <i>Cyp6a20</i>  | Ets21C                | +                   | -77                | 699                             | 9                | 10.286 | -                 | -       |
| <i>Cyp6a20</i>  | schlank               | +                   | -217               | 558                             | -                | -      | 7.9               | -10.068 |
| <i>Cyp6t1</i>   | cad                   | -                   | -1036              | 710                             | 8                | -9.432 | -                 | -       |
| <i>Cyp6t1</i>   | cad                   | -                   | -152               | 1588                            | 8.2              | -9.65  | -                 | -       |
| <i>Cyp6t1</i>   | Cf2                   | +                   | -1380              | 373                             | -                | -      | 9.2               | -11.234 |
| <i>Cyp6t1</i>   | Cf2                   | +                   | -1378              | 373                             | -                | -      | 9.1               | -10.96  |
| <i>Cyp6t1</i>   | Cf2                   | -                   | -1373              | 373                             | 7.5              | -9.363 | -                 | -       |
| <i>Cyp6t1</i>   | Cf2                   | +                   | -1367              | 373                             | 7.5              | -9.363 | -                 | -       |
| <i>Cyp6t1</i>   | ems                   | -                   | -1147              | indel                           | -                | -      | 6.9               | -9.451  |
| <i>Cyp6t1</i>   | eve                   | -                   | -1147              | indel                           | -                | -      | 7.3               | -9.451  |
| <i>Cyp6t1</i>   | hb                    | -                   | -1157              | indel                           | -                | -      | 7.7               | -11.419 |
| <i>Cyp6t1</i>   | pb                    | -                   | -1147              | indel                           | -                | -      | 7.5               | -9.451  |
| <i>Cyp6t1</i>   | schlank               | -                   | -1418              | 319                             | 7.8              | -9.808 | -                 | -       |
| <i>Cyp6t1</i>   | sd                    | +                   | -1718              | indel                           | -                | -      | 7.5               | -10.63  |
| <i>Cyp6t1</i>   | sd                    | -                   | -18                | 1 bp indel                      | 6.7              | -9.207 | -                 | -       |
| <i>Cyp6t1</i>   | zen                   | -                   | -1147              | 373                             | 8.2              | -9.451 | -                 | -       |
| <i>Cyp12a4</i>  | Vsx2                  | -                   | -108               | 472                             | 7.8              | -9.393 | -                 | -       |
|                 |                       |                     |                    | 774, 775,                       |                  |        |                   |         |
| <i>Cyp12a5</i>  | BEAF-32               | -                   | -447               | 777, 781                        | 7.9              | -9.687 | -                 | -       |
|                 |                       |                     |                    | 774, 775,                       |                  |        |                   |         |
| <i>Cyp12a5</i>  | br(var.3)             | +                   | -449               | 777, 781                        | -                | -      | 7.6               | -10.608 |
| <i>Cyp12a5</i>  | Cf2                   | -                   | -799               | 414                             | -                | -      | 9.1               | -10.96  |
|                 |                       |                     |                    | 774, 775,                       |                  |        |                   |         |
| <i>Cyp12a5</i>  | dl                    | +                   | -454               | 777                             | 7.5              | -9.444 | -                 | -       |
|                 |                       |                     |                    | 774, 775,                       |                  | -      |                   |         |
| <i>Cyp12a5</i>  | pnr                   | +                   | -447               | 777, 781                        | 8.3              | 10.083 | -                 | -       |
| <i>Cyp12a5</i>  | tin                   | -                   | -1220              | 1 bp indel                      | 8.1              | -9.774 | -                 | -       |
| <i>Cyp28a5</i>  | br                    | -                   | -475               | 147                             | 7.2              | -9.286 | -                 | -       |
|                 |                       |                     |                    |                                 |                  | -      |                   |         |
| <i>Cyp28a5</i>  | Mad                   | +                   | -27                | N/A                             | 8.8              | 10.582 | 6.3               | -9.491  |
| <i>Cyp28a5</i>  | slp1                  | +                   | -472               | 147                             | 7.9              | -9.637 | -                 | -       |
| <i>Cyp28a5</i>  | twi                   | +                   | -478               | 147                             | -                | -      | 7.8               | -9.869  |
| <i>Cyp28a5</i>  | z                     | -                   | -142               | 482                             | -                | -      | 7.9               | -10.087 |

<sup>a</sup>Matrix models of predicted transcription factor binding sites (TFBS) in the JASPAR CORE Insecta database (Mathelier *et al.* 2016).

<sup>b</sup>TFBS stand orientations. Same orientation as associated gene, +. Opposite orientation of associated gene, -.

<sup>c</sup>Position of start of TFBS from 3' end of tested upstream region.

<sup>d</sup>Position of segregating sites between Z418 and S58 in the alignment of Zambian and Dutch populations that overlap with the predicted TFBS.

<sup>e</sup>Weight and  $\ln(P)$  were calculated using the *matrix-scan* program in the Regulatory Sequence Analysis Tools (RSAT) suite (Teratsinze *et al.* 2008).

### **Literature cited**

1. Mathelier A., O. Fornes, D. J. Arenillas, C. Y. Chen, G. Denay, J. Lee *et al.*, 2016 JASPAR 2016: a major expansion and update of the open-access database of transcription factor binding profiles. *Nucleic Acids Res.* 44: D110-115.

2. Turatsinze, J. V., M. Thomas-Chollier, M. Defrance, and J. van Helden, 2008 Using RSAT to scan genome sequences for transcription factor binding sites and *cis*-regulatory modules. *Nat Protoc.* 3: 1578–1588.
