# Supplementary material
Source: publisher figshare collection journal article supplement (https://gsajournals.figshare.com/articles/dataset/_/6741245)
Supplement: Supplementary file 6 [file 1]

**Table S1 Summary of tested upstream regions**

| Gene <sup>a</sup>                               | Upstream region coordinates       | PCR primers (5' → 3')                               | Length (bp) | Location description                                                                                         |
|-------------------------------------------------|-----------------------------------|-----------------------------------------------------|-------------|--------------------------------------------------------------------------------------------------------------|
| <i>Cyp12a4</i><br>( <i>cis</i> + <i>trans</i> ) | 3R: 19,134,634–<br>19,135,204 [+] | AAGTCCCTCTGTTTGAAAATATTAC<br>GCGATGATTAGAACTTTTCCGG | 576         | Begins 102 bp downstream of <i>Cyp12a5</i> stop codon; ends 5 bp upstream of <i>Cyp12a4</i> start codon      |
| <i>Cyp6t1</i><br>( <i>cis</i> + <i>trans</i> )  | X: 21,519,139–<br>21,520,874 [-]  | GCCCTTGAAGTCATCGTTGT<br>CGTTACTTGAAGAGTGTCGG        | 1770        | Begins 1700 bp upstream of <i>Cyp6t1</i> start codon; ends immediately upstream of <i>Cyp6t1</i> start codon |
| <i>Cyp6a20</i><br>( <i>cis</i> x <i>trans</i> ) | 2R: 14,881,362–<br>14,882,129 [+] | GCCGTCGAAAAATAGATCGC<br>CGG AACAACTGAAAATCTTAGC     | 791         | Begins 36 bp downstream of <i>Cyp6a9</i> start codon; ends 3 bp upstream of <i>Cyp2a20</i> start             |
| <i>Cyp12b2</i><br>(all <i>cis</i> )             | 2R: 18,754,675–<br>18,755,121 [+] | CGGAAAATATGTTGGAGTTTGTATC<br>CTAAGTCCCCTTGATTGGC    | 448         | Begins immediately downstream of <i>Hst3st-A</i> 3' UTR; ends 2 bp upstream of <i>Cyp12b2</i> start codon    |
| <i>Cyp28a5</i><br>( <i>cis</i> + <i>trans</i> ) | 2L: 13,976,736–<br>13,977,353 [+] | TAAATGAGTTCGGCGCAACG<br>TCGCTCTAAAATCTGCGTCCA       | 620         | Begins 47 bp downstream of NimC1 start codon; ends 7 bp upstream of <i>Cyp28a5</i> start codon               |
| <i>Cyp12a5</i><br>( <i>cis</i> x <i>trans</i> ) | 3R: 19,131,464–<br>19,132,683 [+] | CCACTCAGTCTGCTAGTTAAG<br>TTGCACGCTGCCTAATTCA        | 1224        | Begins 3 bp downstream of <i>CG6040</i> stop codon; ends 2 bp upstream of <i>Cyp12a5</i> start codon         |

<sup>a</sup>Inferred type of regulatory variation between S58 and Z418.
