# Supplementary material
Source: publisher figshare collection journal article supplement (https://gsajournals.figshare.com/articles/dataset/_/6741245)
Supplement: Supplementary file 7 [file 1]

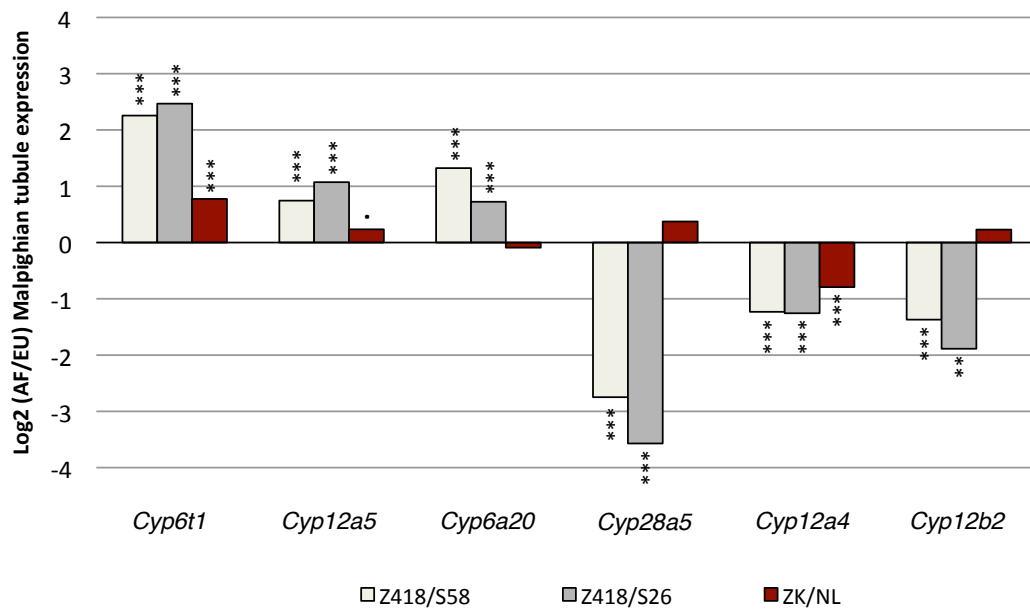

**Figure S3** Ratio of African-to-European expression of the cytochrome P450 genes of interest in the Malpighian tubule. Shown is the relative gene expression, as measured by RNA-seq, of African and European isofemale strains/populations in the current study (white and grey bars) and a previous study (Huylmans and Parsch 2014) comparing gene expression between a Dutch (NL) and a Zimbabwean (ZK) population (red bars).
