# Supplementary material
Source: publisher figshare collection journal article supplement (https://gsajournals.figshare.com/articles/dataset/_/6741245)
Supplement: Supplementary file 8 [file 1]

**Table S2 Additional sequencing primers**

| <b>Upstream region</b> | <b>Primer (5' → 3')</b> |
|------------------------|-------------------------|
| <i>Cyp6t1</i>          | GGTGCGATCGGATTACTACG    |
| <i>Cyp6t1</i>          | CCGTGACACCA AAATGC      |
| <i>Cyp6t1</i>          | GACCGAATTCAGCGACTC      |
| <i>Cyp6t1</i>          | CGCACATATGGATATCAC      |
| <i>Cyp12a5</i>         | GGTTCGCGTGTATTTGAG      |
| <i>Cyp12a5</i>         | CACCACTATTTAATGCTTA     |
| <i>Cyp12a5</i>         | TCAGCGATCGAATGTTCA      |
| <i>Cyp12a5</i>         | CTTGACGCCAATTCAGCTG     |
