# Supplementary material
Source: publisher figshare collection journal article supplement (https://gsajournals.figshare.com/articles/dataset/_/6741245)
Supplement: Supplementary file 9 [file 1]

**Table S8 Summary statistics and genetic differentiation of tested upstream regions in a Dutch and a Zambian population**

| Upstream region | Size (bp) |             |                    |                |                |                |             |                   |                     |                                   |                   |                                |                                 |                                   |                  |
|-----------------|-----------|-------------|--------------------|----------------|----------------|----------------|-------------|-------------------|---------------------|-----------------------------------|-------------------|--------------------------------|---------------------------------|-----------------------------------|------------------|
|                 |           | Population  | Sites <sup>a</sup> | n <sup>b</sup> | S <sup>c</sup> | $\theta^{d,e}$ | $\pi^{d,f}$ | nHap <sup>g</sup> | HapDiv <sup>h</sup> | Dxy <sub>sim</sub> <sup>d,i</sup> | TajD <sup>j</sup> | P <sub>priv</sub> <sup>k</sup> | D <sub>fixed</sub> <sup>l</sup> | Dxy <sub>pop</sub> <sup>d,m</sup> | Fst <sup>n</sup> |
| Cyp6a20         | 768       | Netherlands | 688                | 11             | 9              | 0.447          | 0.359       | 4                 | 0.673               | 11.738                            | -0.821            | 1                              | 0                               | 1.153                             | 0.381            |
|                 |           | Zambia      | 565                | 196            | 52             | 1.573          | 1.141       | 53                | 0.918               | 13.685                            | -0.820            | 39                             |                                 |                                   |                  |
| Cyp6t1          | 1,736     | Netherlands | 1,542              | 11             | 23             | 0.509          | 0.399       | 5                 | 0.618               | 13.824                            | -0.994            | 2                              | 0                               | 0.947                             | 0.430            |
|                 |           | Zambia      | 1,476              | 196            | 75             | 0.868          | 0.786       | 50                | 0.854               | 12.422                            | -0.291            | 44                             |                                 |                                   |                  |
| Cyp12a4         | 571       | Netherlands | 386                | 11             | 13             | 1.150          | 1.413       | 6                 | 0.800               | 6.463                             | 1.002             | 0                              | 0                               | 2.706                             | 0.235            |
|                 |           | Zambia      | 117                | 197            | 18             | 2.626          | 1.253       | 27                | 0.695               | 3.944                             | -1.457            | 12                             |                                 |                                   |                  |
| Cyp12a5         | 1,220     | Netherlands | 920                | 11             | 21             | 0.779          | 0.516       | 6                 | 0.800               | 5.584                             | -1.537            | 0                              | 0                               | 0.682                             | 0.048            |
|                 |           | Zambia      | 628                | 197            | 72             | 1.957          | 1.142       | 96                | 0.972               | 3.712                             | -0.848            | 52                             |                                 |                                   |                  |
| Cyp12b2         | 447       | Netherlands | 295                | 11             | 0              | 0.000          | 0.000       | 1                 | 0.000               | 8.421                             | –                 | 0                              | 0                               | 2.076                             | 0.473            |
|                 |           | Zambia      | 317                | 197            | 51             | 2.746          | 2.035       | 78                | 0.953               | 8.271                             | -0.772            | 35                             |                                 |                                   |                  |
| Cyp28a5         | 618       | Netherlands | 587                | 11             | 3              | 0.174          | 0.204       | 4                 | 0.745               | 5.815                             | 0.587             | 1                              | 0                               | 0.480                             | 0.126            |
|                 |           | Zambia      | 539                | 197            | 58             | 1.837          | 1.227       | 113               | 0.988               | 5.809                             | -1.000            | 46                             |                                 |                                   |                  |

<sup>a</sup>Number of sites included in the analysis (no missing data)

- <sup>b</sup>Number of samples
- <sup>c</sup>Number of segregating sites
- <sup>d</sup>Per 100 sites
- <sup>e</sup>Watterson's estimator of nucleotide diversity
- <sup>f</sup>Mean pairwise nucleotide diversity
- <sup>g</sup>Number of haplotypes
- <sup>h</sup>Haplotype diversity
- <sup>i</sup>Average number of nucleotide substitutions per site between population of interest and *D. simulans*
- <sup>j</sup>Tajima's D, all tests non-significant ( $P > 0.10$ )
- <sup>k</sup>Number of polymorphisms private to the population of interest
- <sup>l</sup>Number of fixed differences between populations
- <sup>m</sup>Average number of nucleotide substitutions per site between populations
- <sup>n</sup>Fixation index between populations
