# Supplementary material
Source: publisher figshare collection journal article supplement (https://gsajournals.figshare.com/articles/dataset/_/6741245)
Supplement: Supplementary file 10 [file 1]

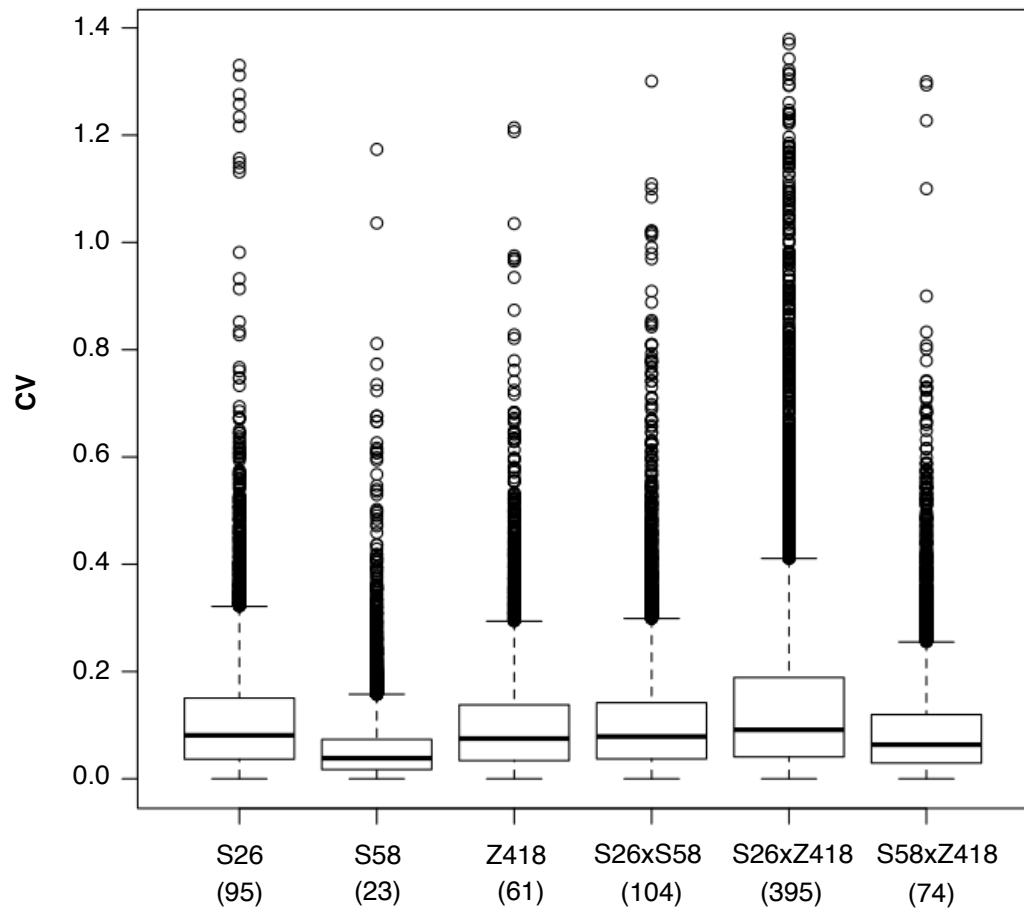

**Figure S1** Distribution of the coefficient of variation (CV) for all genes between biological replicates of each genotype. The number of genes with CV > 0.5 is shown in parentheses under each genotype.
