# Supplementary material
Source: publisher figshare collection journal article supplement (https://gsajournals.figshare.com/articles/dataset/_/6741245)
Supplement: Supplementary file 11 [file 1]

**Table S3 Sequence depth of the candidate P450 genes**

| <b>Gene</b>          | <b>Line</b> |            |             |
|----------------------|-------------|------------|-------------|
|                      | <b>S26</b>  | <b>S58</b> | <b>Z418</b> |
| <i>Cyp12b2</i>       | 73.49       | 70.66      | 34.66       |
| <i>Cyp12a4</i>       | 37.30       | 35.84      | 22.62       |
| <i>Cyp28a5</i>       | 61.48       | 56.08      | 22.11       |
| <i>Cyp6a20</i>       | 62.03       | 42.30      | 43.12       |
| <i>Cyp12a5</i>       | 38.87       | 36.49      | 20.50       |
| <i>Cyp6t1</i>        | 59.06       | 72.99      | 32.76       |
| Average <sup>a</sup> | 66.82       | 64.90      | 29.73       |
| SD <sup>b</sup>      | 17.40       | 20.98      | 7.59        |

<sup>a</sup>Average depth across euchromatic genome.

<sup>b</sup>Standard deviation in depth across euchromatic genome.
